# Supplementary material for: Spatial soft sweeps: Patterns of adaptation in populations with long-range dispersal
Source: PubMed Central journal article supplement (PMC6386408; doi:10.1371/journal.pgen.1007936), 2019-02-11

(a)  $\mu = 0.4$ 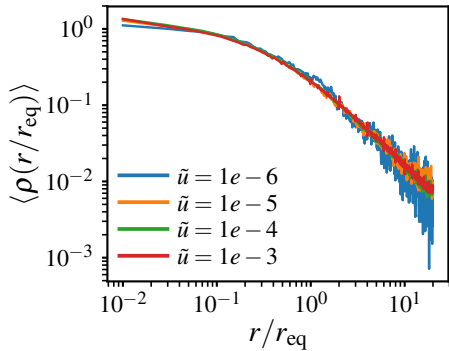(b)  $\mu = 1.0$ 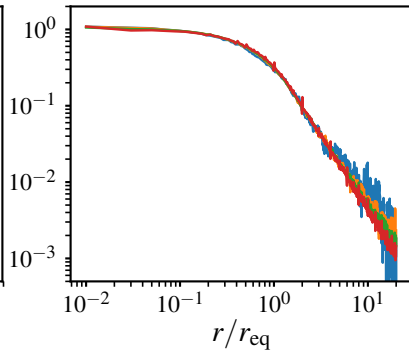(c)  $\mu = 1.6$ 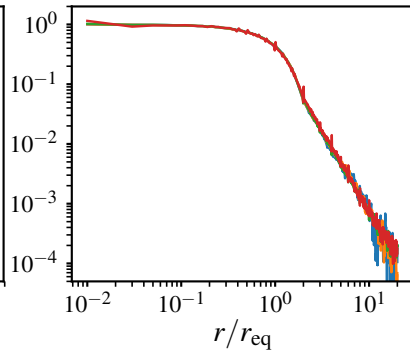

Supplement: pgen.1007936.s004.pdf [file pgen.1007936.s004.pdf]
